# Supplementary material
Source: PubMed Central journal article supplement (PMC7412573)

## Supplemental Data

**Supplemental Table 1.** List of rare variants identified by exome sequencing that were shared by affected family members of family A

| Position        | Ref | Alt | Gene    | Omim_inheritance | Orphanet                                 | Clinvar | Protein_change                  | rsIDs       | Exac_maf  | Maf_all   | Exac_pLi_score (0.9 very intolerant of LoF) | Exac_missense_score | Exac_het | Conserved_in_29_mammals | Sift_score (<0.05 predicted damaging) | Polyphen_score (>0.85 predicted damaging) | Cadd_score (>15 predicts pathogenicity) | Expression in Heart                                                                                              |
|-----------------|-----|-----|---------|------------------|------------------------------------------|---------|---------------------------------|-------------|-----------|-----------|---------------------------------------------|---------------------|----------|-------------------------|---------------------------------------|-------------------------------------------|-----------------------------------------|------------------------------------------------------------------------------------------------------------------|
| chr11:6629415   | C   | T   | ILK     | NA               | NA                                       | None    | ENSP00000299421.3: p.His77Tyr   | rs750788075 | 0         | 0         | 0.021825196                                 | 0.97341716          | 0        | 1.00                    | 0.04                                  | 0.92                                      | 24.2                                    | good                                                                                                             |
| chr10:135098975 | G   | C   | TUBGCP2 | NA               | NA                                       | None    | ENSP00000252936.3: p.Ser627Trp  | rs148683984 | 0         | 0         | 0.0031858                                   | 1.1997263           | 0        | 1.00                    | 0                                     | 1                                         | 18.9                                    | Moderate protein, good RNA expression in heart;                                                                  |
| chr19:3753873   | C   | T   | APBA3   | NA               | NA                                       | None    | ENSP00000315136.2: p.Gly301Ser  | None        | 0         | 0         | 8.58E-11                                    | -1.3398271          | 0        | 1.00                    | 0                                     | 0.995                                     | 22.8                                    | NO protein expressed in adult or fetal heart; RNA is expressed in 2/3 methods in adult heart                     |
| chr17:62530821  | C   | T   | CEP95   | NA               | NA                                       | None    | ENSP00000450906.1: p.Ala515Val  | rs374995934 | 5.80E-05  | 0.0005339 | 1.10E-10                                    | -2.0912751          | 7        | 1.00                    | 0                                     | 0.897                                     | 18.73                                   | NO protein expressed in adult or fetal heart; RNA is well expressed in in adult heart                            |
| chr7:101891806  | G   | C   | CUX1    | NA               | NA                                       | None    | ENSP00000292535.7: p.Glu1334Asp | rs782199350 | 7.22E-05  | 0.0002561 | 0.999952378                                 | 4.74833816          | 2        | 1.00                    | 0.35                                  | 0.217                                     | 18.97                                   | Moderate RNA and protein expression in heart                                                                     |
| chr2:26204522   | A   | C   | KIF3C   | NA               | NA                                       | None    | ENSP00000264712.3: p.Phe89Val   | None        | 0         | 0         | 0.966979331                                 | 2.91839731          | 0        | 1.00                    | None                                  | 0.844                                     | 22.4                                    | RNA expression in 2/3 methods; protein expression moderate in adult heart; no protein expression in fetal heart  |
| chr7:91871373   | C   | T   | KRIT1   | NA               | Familial cerebral cavernous malformation | None    | ENSP00000344668.2: p.Arg26Gln   | rs34358665  | 0.001005  | 0.001649  | 0.041234245                                 | 0.89988444          | 122      | 1.00                    | 0.67                                  | 0.058                                     | 23.4                                    | Low protein expression in adult heart; almost no protein expression in fetal heart; RNA expression good in heart |
| chr22:41617247  | C   | T   | L3MBTL2 | NA               | NA                                       | None    | ENSP00000216237.5: p.Arg300Trp  | rs2277846   | 0.0002072 | 0.002     | 0.028506885                                 | 1.81221723          | 8        | 1.00                    | 0                                     | 0.759                                     | 28.2                                    | RNA and protein expression moderate in adult heart; no protein expression in fetal heart                         |
| chr3:3886878    | C   | T   | LRRN1   | NA               | NA                                       | None    | ENSP00000314901.3: p.Arg185Cys  | rs142381203 | 0.000313  | 0.001     | 0.841865339                                 | 0.39410044          | 38       | 1.00                    | 0                                     | 0.832                                     | 19.26                                   | NO protein expressed in adult or fetal heart; RNA expressed in heart (1/2 methods)                               |
| chr1:169138782  | C   | T   | NME7    | NA               | NA                                       | None    | ENSP00000356785.3: p.Arg334Gln  | rs150610040 | 9.06E-05  | 0.0002326 | 0.011293123                                 | -0.4595322          | 11       | 1.00                    | 0                                     | 0.563                                     | 29.8                                    | NO protein expressed in adult heart; RNA is expressed                                                            |
| chr22:50969367  | T   | G   | ODF3B   | NA               | NA                                       | None    | ENSP00000382804.2: p.Lys180Thr  | rs201117478 | 0.000359  | 0.0006404 | 0.042086148                                 | 2.05739462          | 39       | 1.00                    | 0                                     | 0.931                                     | 22.8                                    | NO protein expressed in adult or fetal heart; RNA is expressed in 2/3 methods in adult heart                     |
| chr1:204242827  | G   | A   | PLEKHA6 | NA               | NA                                       | None    | ENSP00000272203.2: p.Pro10Leu   | rs150173263 | 0.0006836 | 0.002907  | 0.990590539                                 | -0.6347875          | 83       | 1.00                    | 0                                     | 0.026                                     | 15.93                                   | Moderate RNA and protein expression in heart                                                                     |

|                |   |   |         |    |    |      |                                   |             |           |          |             |            |    |      |      |       |       |                                                                                              |
|----------------|---|---|---------|----|----|------|-----------------------------------|-------------|-----------|----------|-------------|------------|----|------|------|-------|-------|----------------------------------------------------------------------------------------------|
| chr3:20025757  | G | C | PP2D1   | NA | NA | None | ENSP00000331295.7:<br>p.Tyr374Ter | rs759393574 | 0         | 0        | NA          | NA         | 0  | 0.00 | None | None  | 12.67 | NO protein expressed in adult or fetal heart; RNA is expressed                               |
| chr11:14316075 | C | T | RRAS2   | -  | NA | None | ENSP00000256196.4:<br>p.Arg117His | rs566703225 | 4.12E-05  | 0.001    | 0.629480625 | 2.00161751 | 5  | 1.00 | 0.02 | 0.999 | 24.5  | good                                                                                         |
| chr1:204095168 | C | T | SOX13   | NA | NA | None | ENSP00000356172.1:<br>p.Ser592Leu | rs376615783 | 6.60E-05  | 8.00E-04 | 0.940358305 | 0.9954718  | 8  | 1.00 | 0.07 | 0.996 | 18.9  | NO protein expressed in adult or fetal heart; RNA is expressed in 2/3 methods in adult heart |
| chr13:33704030 | G | A | STARD13 | NA | NA | None | ENSP00000255486.4:<br>p.Arg254Cys | rs145202504 | 0.0004942 | 0.001    | 3.49E-07    | -0.1288533 | 60 | 1.00 | 0.02 | 0.169 | 17.97 | Moderate RNA and protein expression in heart (SAGE data not available.)                      |
| chr17:53798368 | C | T | TMEM100 | NA | NA | None | ENSP00000395328.2:<br>p.Glu22Lys  | rs756172311 | 8.24E-06  | 1.50E-05 | 0.483326089 | 0.13785496 | 1  | 1.00 | 0.17 | 0.991 | 17.31 | NO protein expressed in adult or fetal heart; RNA is well expressed in in adult heart        |

## Supplemental Figure S2

Design of constructs for transgenic zebrafish lines (a) and electropherograms from genotyped F1 fish for each mutant line showing germline transmission of the dedicated mutation (b).

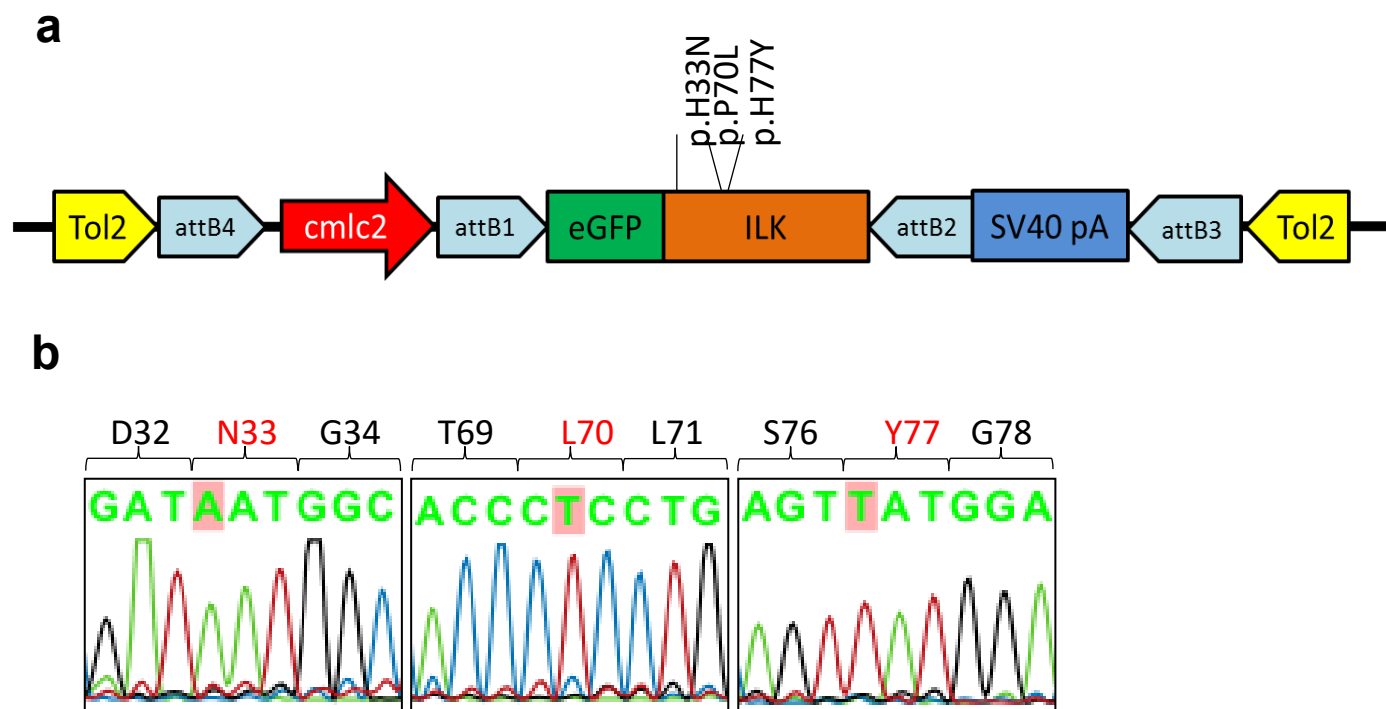

### Supplemental Figure S3

Ventricular diameter / body weight (a) and Ventricular diameter / eye diameter (b) measured in adult (> 3 months) transgenic ILK lines and the non-transgenic control line (NT). No significant changes were observed.

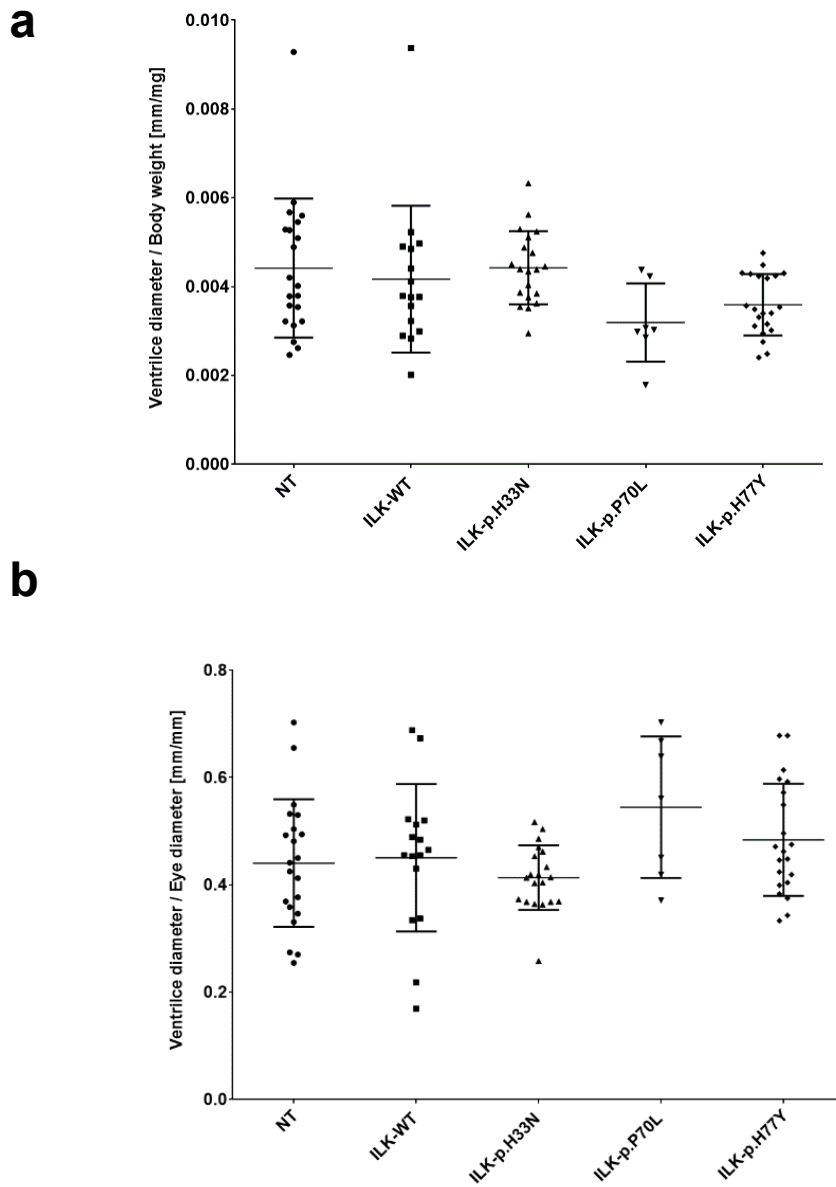

Supplement: NIHMS1607436-supplement-1.pdf [file NIHMS1607436-supplement-1.pdf]
